# Supplementary material
Source: publisher figshare collection journal article supplement (https://diabetesjournals.figshare.com/ndownloader/files/31690094)
Supplement: Supplementary file 1 [file 31690094]

Supple. Table S1. CGM hypoglycemia alarm settings

|                                                   |       |
|---------------------------------------------------|-------|
| Hypoglycemia Alarm                                |       |
| On                                                | 90.3% |
| Off                                               | 9.7%  |
| Glucose value set for hypoglycemia alarms (mg/dL) |       |
| 60                                                | 9.9%  |
| 65                                                | 6.5%  |
| 70                                                | 34.1% |
| 75                                                | 12.9% |
| 80                                                | 26.3% |
| 85                                                | 3.0%  |
| 90                                                | 4.7%  |
| 100                                               | 2.6%  |
| Glucose drop alarm                                |       |
| On                                                | 66.8% |
| Off                                               | 33.2% |
| Urgent low soon (in Dexcom CGM users)             |       |
| On                                                | 88.0% |
| Off                                               | 12.0% |

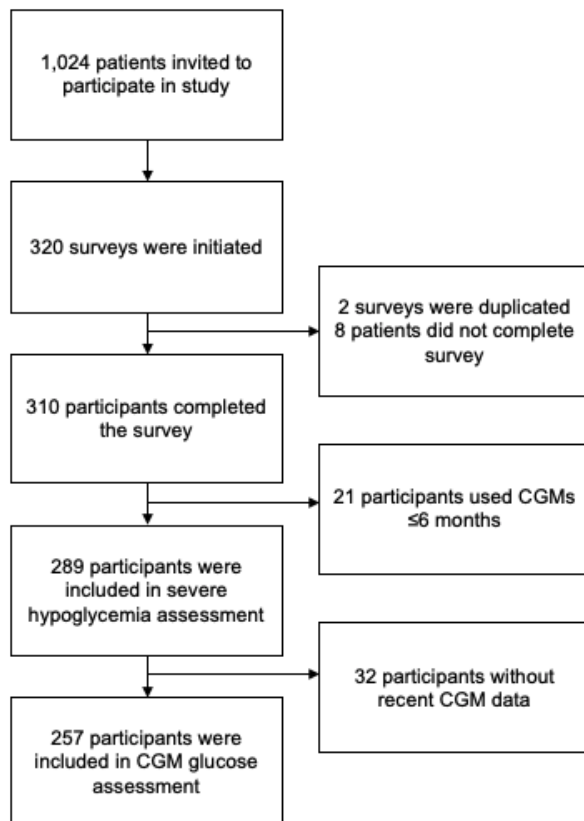

Supple. Fig. S1. Patient participation flowchart. CGM, continuous glucose monitoring system.

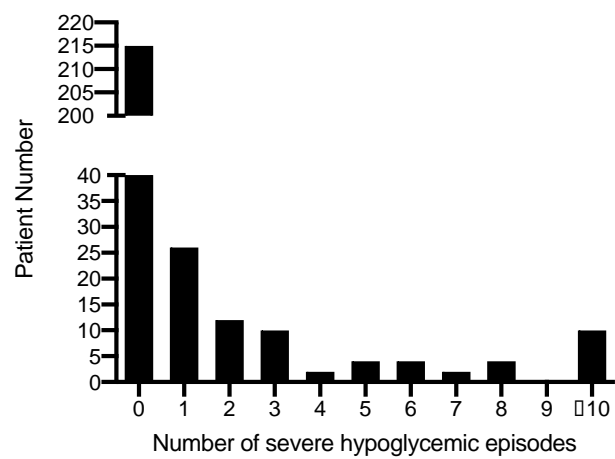

Supple. Fig. S2. Distribution of participants by the number of severe hypoglycemic episodes.
